# Supplementary material
Source: Springer Nature journal article supplement (https://www.springermedizin.de/resource/supplementary/13032_2014_85_MOESM1_ESM.pdf/9651592)

# Vagus nerve stimulation in controlled hemorrhagic shock model

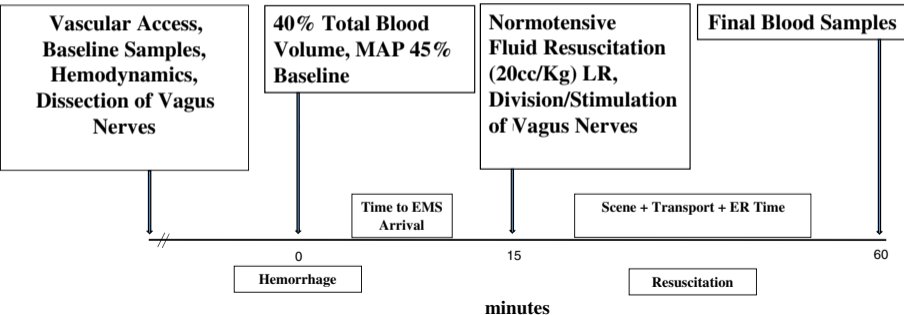

Supplement: MOESM1 [file 9651592]
